# Supplementary material
Source: PubMed Central journal article supplement (PMC4191982)
Supplement: NIHMS611356-supplement-01.pdf [file NIHMS611356-supplement-01.pdf]

## Supplemental Materials

**Supplementary Table 1: Adverse events reported during the REVERSE-DBMD trial.** All randomized subjects were included in the adverse event analysis. Any new symptom was classified as an adverse event, regardless of whether it was believed to be related to the study drug. Asymptomatic abnormalities in laboratory tests and vital signs were defined as adverse events if they were not present at baseline and occurred on 2 or more consecutive visits during the study period. The total person-time was divided into 4 exposure categories: placebo (blinded), first 6 months on sildenafil (blinded), first 6 months on sildenafil after 6 months of placebo (open-label), and second 6 months on sildenafil (open-label). Adverse event rates (number of events per person-month) were calculated for each exposure category. Although rates are similar between groups, there were more severe adverse events (resulting in hospitalization or an emergency room visit) in subjects taking sildenafil. It is also notable that there were more occurrences of asymptomatic hypotension in the group treated with sildenafil, none of which resulted in symptoms of circulatory insufficiency.

|                                                          | Placebo<br>(blinded) | 1st six<br>months<br>on<br>sildenafil<br>(blinded) | 1st six<br>months<br>on<br>sildenafil<br>(open-<br>label) | 2nd six<br>months on<br>sildenafil<br>(open label) |
|----------------------------------------------------------|----------------------|----------------------------------------------------|-----------------------------------------------------------|----------------------------------------------------|
| Number of individuals                                    | 10                   | 10                                                 | 8                                                         | 7                                                  |
| Number of person-months                                  | 51                   | 57                                                 | 48                                                        | 39                                                 |
| <b>Severe AE (requiring hospitalization or ER visit)</b> |                      |                                                    |                                                           |                                                    |
| Death from heart failure                                 | 0                    | 1 (10%)                                            | 0                                                         | 0                                                  |
| Dehydration                                              | 0                    | 0                                                  | 1 (13%)                                                   | 0                                                  |
| Pneumonia                                                | 0                    | 0                                                  | 1 (13%)                                                   | 0                                                  |
| Prostate/scrotal infection                               | 0                    | 0                                                  | 1 (13%)                                                   | 1 (14%)                                            |
| Fecal impaction                                          | 1 (10%)              | 0                                                  | 0                                                         | 0                                                  |
| Gastroparesis                                            | 0                    | 1 (10%)                                            | 0                                                         | 0                                                  |
| <b>Adverse events</b>                                    |                      |                                                    |                                                           |                                                    |
| <u>Constitutional</u>                                    |                      |                                                    |                                                           |                                                    |
| Low-grade fever                                          | 1 (10%)              | 0                                                  | 1 (13%)                                                   | 0                                                  |
| Fatigue                                                  | 1 (10%)              | 0                                                  | 1 (13%)                                                   | 0                                                  |
| Weight loss                                              | 0                    | 0                                                  | 1 (13%)                                                   | 0                                                  |
| Flu-like symptoms                                        | 1 (10%)              | 1 (10%)                                            | 0                                                         | 1 (14%)                                            |
| Coldness                                                 | 0                    | 1 (10%)                                            | 0                                                         | 0                                                  |
| Warmth                                                   | 0                    | 1 (10%)                                            | 0                                                         | 0                                                  |
| Flushing**                                               | 1 (10%)              | 1 (10%)                                            | 0                                                         | 0                                                  |
| Insomnia**                                               | 1 (10%)              | 0                                                  | 0                                                         | 0                                                  |
| <u>Cardiac/circulatory</u>                               |                      |                                                    |                                                           |                                                    |
| LVESV increase >10%                                      | 1 (10%)              | 2 (20%)                                            | 3 (38%)                                                   | 2 (29%)                                            |
| Palpitations/tachycardia                                 | 3 (30%)              | 2 (20%)                                            | 2 (25%)                                                   | 2 (29%)                                            |
| Low blood pressure*                                      | 1 (10%)              | 4 (40%)                                            | 3 (38%)                                                   | 1 (14%)                                            |
| High blood pressure                                      | 0                    | 0                                                  | 1 (13%)                                                   | 0                                                  |

|                                             |         |         |         |         |
|---------------------------------------------|---------|---------|---------|---------|
| Edema                                       | 0       | 1 (10%) | 0       | 3 (43%) |
| Chest tightness                             | 1 (10%) | 0       | 0       | 0       |
| <u>Respiratory</u>                          |         |         |         |         |
| Cough                                       | 1 (10%) | 0       | 1 (13%) | 1 (14%) |
| Tachypnea                                   | 1 (10%) | 0       | 0       | 0       |
| Congestion**                                | 1 (10%) | 0       | 1 (13%) | 0       |
| Upper respiratory/sinus infection**         | 1 (10%) | 1 (10%) | 0       | 0       |
| <u>Gastrointestinal</u>                     |         |         |         |         |
| Constipation                                | 0       | 0       | 1 (13%) | 0       |
| GI viral symptoms                           | 0       | 1 (10%) | 1 (13%) | 1 (14%) |
| Nausea/vomiting*                            | 2 (20%) | 0       | 0       | 0       |
| Diarrhea*                                   | 2 (20%) | 0       | 0       | 0       |
| Gallstones                                  | 0       | 0       | 0       | 1 (14%) |
| <u>Genitourinary</u>                        |         |         |         |         |
| UTI                                         | 0       | 0       | 1 (13%) | 0       |
| Nephrolithiasis                             | 0       | 0       | 0       | 1 (14%) |
| Frequent erections                          | 0       | 1 (10%) | 1 (13%) | 0       |
| <u>Neurologic</u>                           |         |         |         |         |
| Headache**                                  | 2 (20%) | 1 (10%) | 0       | 0       |
| Tingling*                                   | 0       | 2 (20%) | 0       | 0       |
| Dizziness*                                  | 0       | 1 (10%) | 0       | 0       |
| <u>Other</u>                                |         |         |         |         |
| Increased intraocular pressure              | 0       | 0       | 1 (13%) | 0       |
| Ear pain, hearing loss*                     | 1 (10%) | 0       | 0       | 0       |
| Depression                                  | 0       | 0       | 1 (13%) | 0       |
| Traumatic fracture                          | 0       | 0       | 1 (13%) | 0       |
| Sensitivity to sun                          | 0       | 0       | 1 (13%) | 0       |
| <u>Hematologic laboratory abnormalities</u> |         |         |         |         |
| ↓ hemoglobin/hematocrit                     | 1 (10%) | 1 (10%) | 1 (13%) | 2 (29%) |
| ↑ hemoglobin                                | 1 (10%) | 1 (10%) | 1 (13%) | 1 (14%) |
| ↓ platelets                                 | 0       | 0       | 1 (13%) | 0       |
| ↑ platelets                                 | 1 (10%) | 1 (10%) | 1 (13%) | 1 (14%) |
| ↓ mean platelet volume                      | 0       | 1 (10%) | 0       | 1 (14%) |
| ↓ eosinophils                               | 0       | 1 (10%) | 0       | 1 (14%) |
| ↑ eosinophils                               | 1 (10%) | 0       | 0       | 0       |
| ↑ monocytes                                 | 1 (10%) | 1 (10%) | 1 (13%) | 1 (14%) |
| ↓ lymphocytes                               | 0       | 2 (20%) | 0       | 1 (14%) |
| ↑ lymphocytes                               | 0       | 1 (10%) | 0       | 1 (14%) |
| <u>Metabolic laboratory abnormalities</u>   |         |         |         |         |
| ↓ sodium                                    | 1 (10%) | 1 (10%) | 1 (13%) | 0       |
| ↓ chloride                                  | 1 (10%) | 1 (10%) | 1 (13%) | 0       |
| ↓ bicarbonate                               | 2 (20%) | 1 (10%) | 2 (25%) | 0       |
| ↑ anion gap                                 | 1 (10%) | 2 (20%) | 1 (13%) | 0       |

|                                          |             |             |             |             |
|------------------------------------------|-------------|-------------|-------------|-------------|
| ↑ phosphorus                             | 2 (20%)     | 1 (10%)     | 1 (13%)     | 0           |
| ↓ phosphorus                             | 0           | 0           | 0           | 1 (14%)     |
| ↓ glucose                                | 0           | 1 (10%)     | 0           | 0           |
| ↓ alkaline phosphatase                   | 1 (10%)     | 0           | 1 (13%)     | 0           |
| <b>Total number of events</b>            | <b>36</b>   | <b>38</b>   | <b>37</b>   | <b>22</b>   |
| <b>Number of events per person-month</b> | <b>0.71</b> | <b>0.67</b> | <b>0.77</b> | <b>0.56</b> |

\*\*common AE's associated with sildenafil

\*rare AE's associated with sildenafil

**Supplementary Table 2: Genotype, phenotype, and cardiac function data for all randomized subjects.**

| Subject ID | Treatment group | Baseline LVESV | 6 month LVESV | 12 month LVESV | Age at enrollment | Diagnosis | Dystrophin mutation           |
|------------|-----------------|----------------|---------------|----------------|-------------------|-----------|-------------------------------|
| 1          | Sildenafil      | 95.59          | 95.99         | 93.99          | 23                | Duchenne  | muscle biopsy diagnosis       |
| 3          | Sildenafil      | 60.06          | 54.73         | 36.6           | 42                | Duchenne  | deletion exons 49-52          |
| 5          | Sildenafil      | 49.49          | 50.6          | 48.3           | 19                | Duchenne  | deletion exons 3-19           |
| 7          | Sildenafil      | 131.64         | 162.65        | 189.5          | 18                | Duchenne  | deletion exons 48-50          |
| 10         | Sildenafil      | 127.51         | deceased      |                | 26                | Duchenne  | large deletion, exons unknown |
| 11         | Sildenafil      | 232.38         | 270.51        | 307.83         | 21                | Duchenne  | c.2613_2614ins335             |
| 12         | Sildenafil      | 78.01          | 81.84         | 74.19          | 27                | Duchenne  | deletion exons 45-52          |
| 17         | Sildenafil      | 105.24         | 72.48         | 83.99          | 38                | Becker    | duplication exons 2-7         |
| 20         | Sildenafil      | 65.91          | withdrew      |                | 20                | Duchenne  | muscle biopsy diagnosis       |
| 22         | Sildenafil      | 68.8           | study closed  |                | 21                | Duchenne  | deletion exons 47-48          |
| 2          | Placebo         | 115.51         | 107.68        | 111.52         | 20                | Duchenne  | muscle biopsy diagnosis       |
| 4          | Placebo         | 61.59          | 58.52         | 62.65          | 24                | Duchenne  | large deletion, exons unknown |
| 6          | Placebo         | 61.27          | 65.34         | 65.68          | 18                | Duchenne  | deletion exons 46-51          |
| 8          | Placebo         | 71.14          | 80.42         | 72.94          | 21                | Duchenne  | deletion exons 16-19          |
| 9          | Placebo         | 84.06          | 86.4          | 82.03          | 24                | Duchenne  | deletion exons 8-9            |
| 15         | Placebo         | 121.69         | 119.87        | 142.88         | 26                | Becker    | deletion exons 45, 47, 48     |
| 16         | Placebo         | 123.92         | 118.2         | 133.25         | 21                | Duchenne  | c.5378_5379del                |
| 18         | Placebo         | 35.07          | 36.29         | study closed   | 33                | Duchenne  | muscle biopsy diagnosis       |
| 21         | Placebo         | 123            | withdrew      |                | 19                | Duchenne  | deletion exons 8-47           |
| 23         | Placebo         | 71.38          | study closed  |                | 20                | Duchenne  | deletion exons 9-18           |

**Supplementary Video Files:** Four-chamber long-axis cine MRI images from a single study subject randomized to the sildenafil treatment arm. These images demonstrate significantly enlarged ventricles and atria, tricuspid valve regurgitation, and significant wall thinning in the apical portion of the heart at baseline (Video 1), which progressively worsens by the six and 12-month follow-up studies (Videos 2 and 3). A short-axis slice from the 12-month study also shows dilated ventricles and a severely reduced ejection fraction (Video 4).

**Supplementary Video 1:** Long-axis cine cardiac MRI – Baseline

**Supplementary Video 2:** Long-axis cine cardiac MRI – Six months

**Supplementary Video 3:** Long-axis cine cardiac MRI – 12 months

**Supplementary Video 4:** Short-axis cine cardiac MRI – 12 months
